# Supplementary material for: Colourimetric assay for β-estradiol based on the peroxidase-like activity of Fe3O4@mSiO2@HP-β-CD nanoparticles
Source: Royal Society of Chemistry journal article supplement (doi:10.1039/c5ra20695b), 2015-01-01
Supplement: c5ra20695b1.pdf [file c5ra20695b1.pdf]

# Electronic supplementary information:

## “Colourimetric Assay for $\beta$ -estradiol Based on Peroxidase-like Activity of $\text{Fe}_3\text{O}_4@\text{mSiO}_2@\text{HP-}\beta\text{-CD}$ Nanoparticles”

Shoulian Wei, Jianwen Li, Yong Liu\*

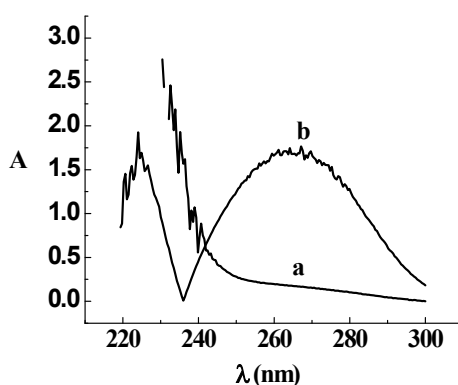

Fig.S1 UV spectra of 4.8  $\mu\text{M}$   $\beta\text{-E}_2$  (b) and its reaction product (a)

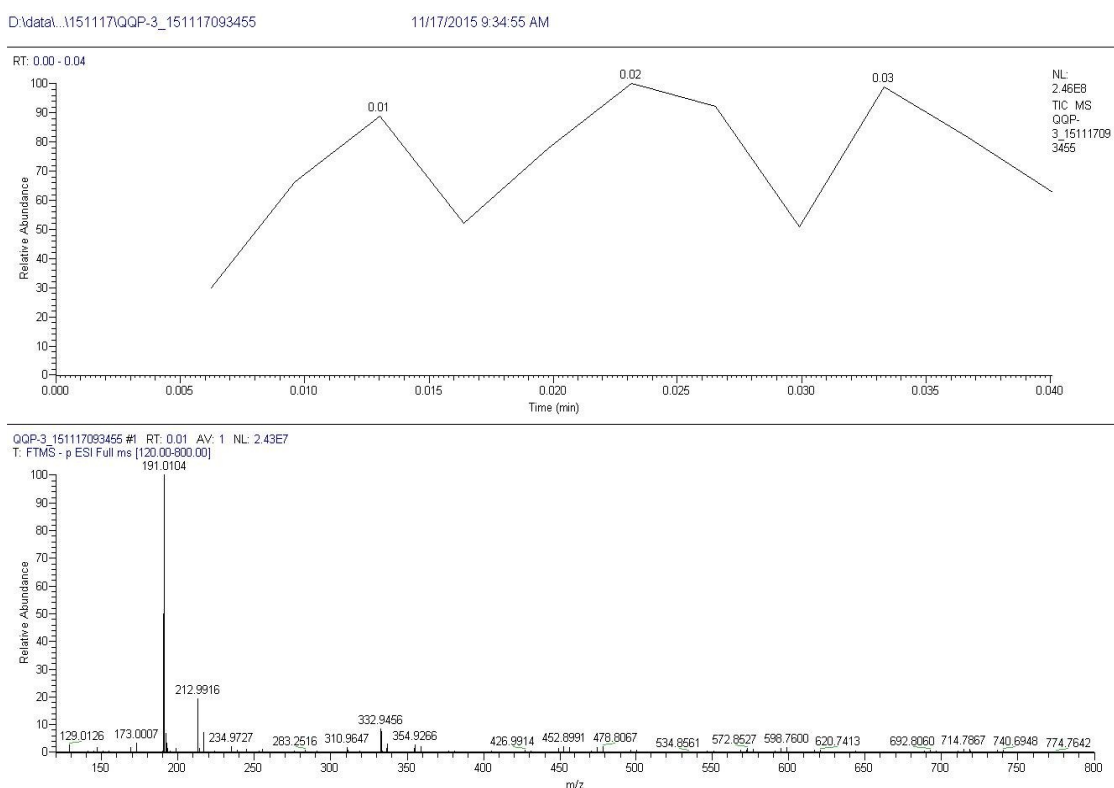

Fig.S2 LC-Mass spectra of the reaction product of  $\beta$ -estradiol.
